# Supplementary material for: Effects of Food Source Availability, Host Egg:Parasitoid Ratios, and Host Exposure Times on the Developmental Biology of Megacopta cribraria Egg Parasitoids
Source: MDPI journal article supplement (doi:10.3390/insects14090755), 2023-09-09
Supplement: s1 [file s1]

Research Article

**Effects of food source availability, host egg: parasitoid ratios, and host exposure times on the developmental biology of *Megacocta cribraria* egg parasitoids**

Sanower Warsi<sup>1</sup>, Ana M. Chicas-Mosier<sup>2</sup>, Rammohan R. Balusu<sup>3</sup>, Alana L. Jacobson<sup>1\*</sup> Henry Y. Fadamiro<sup>4</sup>

<sup>1</sup> Department of Entomology and Plant Pathology, Auburn University, Auburn, AL, USA; szw0132@auburn.edu, alj0043@auburn.edu

<sup>2</sup> Center for Environmentally Beneficial Catalysis, University of Kansas, Lawrence, Kansas, USA; ana.chicasmosier@ku.edu

<sup>3</sup> BASF Agricultural Products Group, Research Triangle, NC, USA; rammohan.balusu@basf.com

<sup>4</sup> Department of Entomology, Texas A&M University, College Station, TX, USA; henry.fadamiro@tamu.edu

\* Correspondence: alj0043@auburn.edu Tel.: (334) 844-5011.

**Supplement file**

**Table S1. Parametric Two-Way ANOVA to evaluate the effects of the constant supply of water and honey on several life-history traits of *Ooencyrtus nezarae* reared on eggs of *Megacocta cribraria*, throughout the parasitoid's lifespan. *N* = (10) water, (10) honey, (10) water + honey, and (10) fasting. One mated individual wasp formed each replicate.**

| Life history trait    | Source of variation      | df      | F     | <i>p</i> -value |
|-----------------------|--------------------------|---------|-------|-----------------|
| Host eggs parasitized | Diet                     | 3, 253  | 16.37 | <0.0001         |
|                       | Age                      | 29, 253 | 3.15  | <0.0001         |
|                       | Diet and age interaction | 31, 253 | 1.12  | 0.315           |
| Emerged host nymphs   | Diet                     | 3, 253  | 7.30  | 0.0001          |
|                       | Age                      | 29, 253 | 1.87  | 0.0058          |
|                       | Diet and age interaction | 31, 253 | 1.41  | 0.079           |
| Wasp offspring        | Diet                     | 3, 253  | 13.44 | <0.0001         |
|                       | Age                      | 29, 253 | 3.30  | <0.0001         |
|                       | Diet and age interaction | 31, 253 | 0.96  | 0.528           |
| Offspring sex ratio   | Diet                     | 3, 253  | 7.17  | 0.0001          |
|                       | Age                      | 29, 253 | 2.40  | 0.0002          |
|                       | Diet and age interaction | 31, 253 | 0.66  | 0.917           |

**Table S2. Parametric Two-Way ANOVA to evaluate the effects of the constant supply of water and honey on several life-history traits of *Paratelenomus saccharalis* reared on eggs of *Megacocta cribraria*, throughout the parasitoid's lifespan. *N* = (8) water, (8) honey, (8) water + honey, and (8) fasting. One mated individual wasp formed each replicate.**

| Life history trait | Source of variation | df | F | <i>p</i> -value |
|--------------------|---------------------|----|---|-----------------|
|--------------------|---------------------|----|---|-----------------|

|                       |                          |         |       |         |
|-----------------------|--------------------------|---------|-------|---------|
| Host eggs parasitized | Diet                     | 3, 141  | 2.12  | 0.1002  |
|                       | Age                      | 13, 141 | 17.80 | <0.0001 |
|                       | Diet and age interaction | 13, 141 | 1.98  | 0.026   |
| Emerged host nymphs   | Diet                     | 3, 141  | 2.34  | 0.0763  |
|                       | Age                      | 13, 141 | 10.84 | <0.0001 |
|                       | Diet and age interaction | 13, 141 | 1.51  | 0.120   |
| Wasp offspring        | Diet                     | 3, 141  | 1.91  | 0.1309  |
|                       | Age                      | 13, 141 | 16.28 | <0.0001 |
|                       | Diet and age interaction | 13, 141 | 2.26  | 0.0101  |
| Offspring sex ratio   | Diet                     | 3, 141  | 2.44  | 0.066   |
|                       | Age                      | 13, 141 | 3.47  | 0.0001  |
|                       | Diet and age interaction | 13, 141 | 1.27  | 0.235   |

**Table S3.** Results of a Kruskal–Wallis ANOVA with Dunn’s post hoc test comparing the proportion of eggs parasitized, emerged *M. cribraria* nymphs, wasp offspring, and offspring sex ratio (female/total) compared between different host densities of *Ooencyrtus nezarae* [sample size (*n*)= 20] and *Paratelenomus saccharalis* [sample size (*n*)= 10]. The 'z' value represents the standardized test statistic derived from Dunn’s post hoc test, which measures the difference between ranks of two groups. A higher absolute z-value indicates a greater difference between the two groups being compared.

| Parasitoid species               | Experiment  | Host density comparison | Host eggs parasitized            | Emerged <i>M. cribraria</i> nymphs | Wasp offspring                   | Offspring sex ratio            |
|----------------------------------|-------------|-------------------------|----------------------------------|------------------------------------|----------------------------------|--------------------------------|
| <i>Ooencyrtus nezarae</i>        | Single wasp | 21 vs. 42               | $z = 1.84, p = 0.06$             | $z = -1.74, p = 0.08$              | $z = 1.40, p = 0.16$             | $z = -1.43, p = 0.15$          |
|                                  |             | 21 vs. 84               | $z = 6.09, p < 0.001$            | $z = -5.71, p < 0.001$             | $z = 5.71, p < 0.001$            | $z = -1.56, p = 0.11$          |
|                                  |             | 21 vs. 168              | $z = 7.87, p < 0.001$            | $z = -6.68, p < 0.001$             | $z = 7.94, p < 0.001$            | $z = -0.22, p = 0.82$          |
|                                  |             | 42 vs. 84               | $z = 4.25, p < 0.001$            | $z = -3.96, p < 0.001$             | $z = 4.30, p < 0.001$            | $z = -0.13, p = 0.89$          |
|                                  |             | 42 vs. 168              | $z = 6.03, p < 0.001$            | $z = -4.93, p < 0.001$             | $z = 6.54, p < 0.001$            | $z = 1.20, p = 0.22$           |
|                                  |             | 84 vs. 168              | $z = 1.77, p = 0.07$             | $z = -0.97, p = 0.33$              | $z = 2.23, p = 0.02$             | $z = 1.34, p = 0.18$           |
|                                  |             |                         | $(H = 80.18, df = 3, p < 0.001)$ | $(H = 60.71, df = 3, p < 0.001)$   | $(H = 82.10, df = 3, p < 0.001)$ | $(H = 3.90, df = 3, p = 0.27)$ |
|                                  | Seven wasps | 21 vs. 42               | $z = 2.02, p = 0.04$             | $z = -1.65, p = 0.09$              | $z = -1.45, p = 0.14$            | $z = -1.54, p = 0.12$          |
|                                  |             | 21 vs. 84               | $z = 3.24, p = 0.001$            | $z = -3.94, p < 0.001$             | $z = -1.91, p = 0.05$            | $z = -2.04, p = 0.04$          |
|                                  |             | 21 vs. 168              | $z = 7.78, p < 0.001$            | $z = -8.82, p < 0.001$             | $z = 2.39, p = 0.01$             | $z = -1.39, p = 0.16$          |
|                                  |             | 42 vs. 84               | $z = 1.22, p = 0.22$             | $z = -2.29, p = 0.02$              | $z = -0.46, p = 0.64$            | $z = -0.50, p = 0.61$          |
|                                  |             | 42 vs. 168              | $z = 5.76, p < 0.001$            | $z = -7.17, p < 0.001$             | $z = 3.85, p < 0.001$            | $z = 0.14, p = 0.88$           |
|                                  |             | 84 vs. 168              | $z = 4.53, p < 0.001$            | $z = -4.88, p < 0.001$             | $z = 4.31, p < 0.001$            | $z = 0.64, p = 0.51$           |
|                                  |             |                         | $(H = 65.20, df = 3, p < 0.001)$ | $(H = 88.36, df = 3, p < 0.001)$   | $(H = 22.62, df = 3, p < 0.001)$ | $(H = 4.60, df = 3, p = 0.20)$ |
| <i>Paratelenomus saccharalis</i> | Single wasp | 21 vs. 42               | $z = 0.94, p = 0.34$             | $z = -0.96, p = 0.33$              | $z = 0.53, p = 0.59$             | $z = -0.54, p = 0.58$          |
|                                  |             | 21 vs. 84               | $z = 4.29, p < 0.001$            | $z = -4.15, p < 0.001$             | $z = 3.73, p < 0.001$            | $z = 1.07, p = 0.28$           |
|                                  |             | 21 vs. 168              | $z = 6.78, p < 0.001$            | $z = -7.10, p < 0.001$             | $z = 6.35, p < 0.001$            | $z = -0.67, p = 0.49$          |
|                                  |             | 42 vs. 84               | $z = 3.34, p < 0.001$            | $z = -3.17, p = 0.001$             | $z = 3.20, p = 0.001$            | $z = 1.62, p = 0.10$           |
|                                  |             | 42 vs. 168              | $z = 5.84, p < 0.001$            | $z = -6.14, p < 0.001$             | $z = 5.82, p < 0.001$            | $z = -0.14, p = 0.88$          |
|                                  |             | 84 vs. 168              | $z = 2.58, p = 0.01$             | $z = -3.04, p = 0.002$             | $z = 2.69, p = 0.007$            | $z = -1.74, p = 0.08$          |
|                                  |             |                         | $(H = 58.24, df = 3, p < 0.001)$ | $(H = 62.37, df = 3, p < 0.001)$   | $(H = 52.60, df = 3, p < 0.001)$ | $(H = 3.83, df = 3, p = 0.28)$ |
|                                  |             | 21 vs. 42               | $z = -0.48, p = 0.62$            | $z = -1.63, p = 0.10$              | $z = -2.12, p = 0.03$            | $z = -3.59, p < 0.001$         |

|  |                    |            |                                           |                                           |                                           |                                           |
|--|--------------------|------------|-------------------------------------------|-------------------------------------------|-------------------------------------------|-------------------------------------------|
|  | <b>Seven wasps</b> | 21 vs. 84  | $z = 1.01, p = 0.30$                      | $z = -2.48, p = \mathbf{0.01}$            | $z = -0.85, p = 0.39$                     | $z = -3.13, p = \mathbf{0.002}$           |
|  |                    | 21 vs. 168 | $z = 2.85, p = \mathbf{0.004}$            | $z = -4.97, p < \mathbf{0.001}$           | $z = 1.15, p = 0.24$                      | $z = -4.65, p < \mathbf{0.001}$           |
|  |                    | 42 vs. 84  | $z = 1.50, p = 0.13$                      | $z = -0.84, p = 0.39$                     | $z = 1.27, p = 0.20$                      | $z = 0.45, p = 0.64$                      |
|  |                    | 42 vs. 168 | $z = 3.34, p < \mathbf{0.001}$            | $z = -3.33, p < \mathbf{0.001}$           | $z = 3.28, p = \mathbf{0.001}$            | $z = -1.06, p = 0.28$                     |
|  |                    | 84 vs. 168 | $z = 1.84, p = 0.06$                      | $z = -2.49, p = \mathbf{0.01}$            | $z = 2.01, p = \mathbf{0.04}$             | $z = -1.52, p = 0.12$                     |
|  |                    |            | $(H = 13.14, df = 3, p = \mathbf{0.004})$ | $(H = 25.84, df = 3, p < \mathbf{0.001})$ | $(H = 11.51, df = 3, p = \mathbf{0.009})$ | $(H = 24.01, df = 3, p < \mathbf{0.001})$ |

Significant values ( $p \leq 0.05$ ) are in bold font.

**Table S4.** Results of a Kruskal–Wallis ANOVA with Dunn’s post hoc test comparing the proportion of *Megacopta cribraria* eggs parasitized, emerged *M. cribraria* nymphs, wasp offspring, and offspring sex ratio (female/total) among host exposure times (days) for *Ooencyrtus nezarae* [sample size (*n*)= 20] and *Paratelenomus saccharalis* [sample size (*n*)= 10]. The 'z' value represents the test statistic from the Dunn's post hoc test, indicating the strength and direction of differences between comparisons.

| Parasitoid species               | Experiment  | Host exposure time comparison | Host eggs parasitized        | Emerged <i>M. cribraria</i> nymphs | Wasp offspring               | Offspring sex ratio          |
|----------------------------------|-------------|-------------------------------|------------------------------|------------------------------------|------------------------------|------------------------------|
| <i>Ooencyrtus nezarae</i>        | Single wasp | 1 vs. 3                       | $z = -6.19, p < 0.001$       | $z = 4.81, p < 0.001$              | $z = -5.88, p < 0.001$       | $z = -2.65, p = 0.008$       |
|                                  |             | 1 vs. 5                       | $z = -7.71, p < 0.001$       | $z = 7.63, p < 0.001$              | $z = -7.25, p < 0.001$       | $z = -0.72, p = 0.46$        |
|                                  |             | 3 vs. 5                       | $z = -1.51, p = 0.12$        | $z = 2.81, p = 0.005$              | $z = -1.36, p = 0.17$        | $z = 1.92, p = 0.05$         |
|                                  |             |                               | $(H=66.76, df=2, p < 0.001)$ | $(H=59.59, df=2, p < 0.001)$       | $(H=59.48, df=2, p < 0.001)$ | $(H=7.52, df=2, p = 0.02)$   |
|                                  | Seven wasps | 1 vs. 3                       | $z = -4.15, p < 0.001$       | $z = 4.02, p < 0.001$              | $z = -1.29, p = 0.19$        | $z = -0.42, p = 0.67$        |
|                                  |             | 1 vs. 5                       | $z = -5.78, p < 0.001$       | $z = 5.38, p < 0.001$              | $z = 0.80, p = 0.42$         | $z = 0.38, p = 0.70$         |
|                                  |             | 3 vs. 5                       | $z = -1.62, p = 0.10$        | $z = 1.35, p = 0.17$               | $z = 2.09, p = 0.03$         | $z = 0.80, p = 0.42$         |
|                                  |             |                               | $(H=36.63, df=2, p < 0.001)$ | $(H=31.32, df=2, p < 0.001)$       | $(H=4.46, df=2, p = 0.10)$   | $(H=0.64, df=2, p = 0.72)$   |
| <i>Paratelenomus saccharalis</i> | Single wasp | 1 vs. 3                       | $z = -0.95, p = 0.34$        | $z = 1.75, p = 0.07$               | $z = -1.08, p = 0.28$        | $z = 2.60, p = 0.009$        |
|                                  |             | 1 vs. 5                       | $z = -1.17, p = 0.24$        | $z = 1.20, p = 0.22$               | $z = -0.87, p = 0.38$        | $z = 0.39, p = 0.69$         |
|                                  |             | 3 vs. 5                       | $z = -0.21, p = 0.82$        | $z = -0.55, p = 0.58$              | $z = 0.20, p = 0.83$         | $z = -2.21, p = 0.02$        |
|                                  |             |                               | $(H = 1.55, df=2, p = 0.46)$ | $(H = 3.23, df=2, p = 0.19)$       | $(H = 1.32, df=2, p = 0.51)$ | $(H = 7.89, df=2, p = 0.01)$ |
|                                  | Seven wasps | 1 vs. 3                       | $z = -0.97, p = 0.32$        | $z = 0.53, p = 0.59$               | $z = -1.07, p = 0.28$        | $z = -0.27, p = 0.78$        |
|                                  |             | 1 vs. 5                       | $z = 1.16, p = 0.24$         | $z = -1.94, p = 0.05$              | $z = 1.02, p = 0.30$         | $z = 0.85, p = 0.39$         |
|                                  |             | 3 vs. 5                       | $z = 2.14, p = 0.03$         | $z = -2.47, p = 0.01$              | $z = 2.10, p = 0.03$         | $z = 1.12, p = 0.25$         |
|                                  |             |                               | $(H = 4.59, df=2, p = 0.10)$ | $(H = 6.79, df=2, p = 0.03)$       | $(H = 4.41, df=2, p = 0.11)$ | $(H = 1.38, df=2, p = 0.49)$ |

Significant values ( $p \leq 0.05$ ) are in bold font.
